# Supplementary material
Source: bioRxiv or medRxiv preprint supplement (https://www.biorxiv.org/highwire/filestream/69036/field_highwire_adjunct_files/7/216754-16.pdf)
Supplement: Supplementary file [file 216754-16.pdf]

Supplementary Table 7: Experimental validation of the modules and their target genes regulated by GPX2 as a causative driver of the pancancer smoking community.

SUMMARY

| Cancer  | Module | consensus (A549/CGS001_A549_96H.GPX2.1) | shRNA2 (A549/KDC007_A549_96H.TRCN0000046238.666) | shRNA1 (A549/KDC007_A549_96H.TRCN0000046239.666) | Size # genes in module | Size # genes measured in LINC | Size Leading Edge | Size Leading Edge shRNA2 (A549/KDC007_A549_96H.TRCN0000046238.666) | Size Leading Edge shRNA1 (A549/KDC007_A549_96H.TRCN0000046239.666) |
|---------|--------|-----------------------------------------|--------------------------------------------------|--------------------------------------------------|------------------------|-------------------------------|-------------------|--------------------------------------------------------------------|--------------------------------------------------------------------|
| LUAD    | 10     | P-value<0.0001 & FDR<0.0001             | P-value<0.0001 & FDR<0.0001                      | P-value=0.0039 & FDR=0.0040                      | 39                     | 15                            | 11                | 11                                                                 | 10                                                                 |
| LUSC    | 64     | P-value=0.3194 & FDR=0.3176             | P-value=0.0919 & FDR=0.1311                      | P-value=0.3152 & FDR=0.2990                      | 29                     | 11                            |                   | 6                                                                  |                                                                    |
|         | 99     | P-value<0.0001 & FDR<0.0001             | P-value<0.0001 & FDR<0.0001                      | P-value<0.0001 & FDR<0.0001                      | 41                     | 25                            | 19                | 17                                                                 | 20                                                                 |
| BLCA    | 11     | P-value<0.0001 & FDR=0.0051             | P-value<0.0001 & FDR=0.0059                      | P-value<0.0001 & FDR=0.0010                      | 23                     | 14                            | 9                 | 10                                                                 | 10                                                                 |
|         | 65     | P-value=0.1846 & FDR=0.3592             | P-value=0.2718 & FDR=0.2760                      | P-value=0.0809 & FDR=0.1511                      | 30                     | 6                             |                   |                                                                    | 5                                                                  |
| HNSC    | 27     | P-value=0.1176 & FDR=0.1307             | P-value=0.1582 & FDR=0.1784                      | P-value=0.0325 & FDR=0.0374                      | 28                     | 18                            | 14                | 9                                                                  | 12                                                                 |
|         | 57     | P-value=0.6747 & FDR=0.6836             | P-value=0.7072 & FDR=0.7117                      | P-value=0.7390 & FDR=0.7393                      | 31                     | 6                             |                   |                                                                    |                                                                    |
| UCEC    | 97     | P-value=0.0062 & FDR=0.0054             | P-value=0.0104 & FDR=0.0095                      | P-value=0.0042 & FDR=0.0044                      | 16                     | 9                             | 8                 | 7                                                                  | 8                                                                  |
| LUAD    | 10     | NES=-2.4871                             | NES=-2.549                                       | NES=-2.085                                       | 39                     | 15                            | 11                | 11                                                                 | 10                                                                 |
| LUSC    | 64     | NES=-1.1048                             | NES=-1.4226                                      | NES=-1.1213                                      | 29                     | 11                            |                   | 6                                                                  |                                                                    |
|         | 99     | NES=-2.4916                             | NES=-2.2605                                      | NES=-2.6911                                      | 41                     | 25                            | 19                | 17                                                                 | 20                                                                 |
| BLCA    | 11     | NES=-2.0557                             | NES=-2.0557                                      | NES=-2.2099                                      | 23                     | 14                            | 9                 | 10                                                                 | 10                                                                 |
|         | 65     | NES=-1.2769                             | NES=1.1567                                       | NES=1.4928                                       | 30                     | 6                             |                   |                                                                    | 5                                                                  |
| HNSC    | 27     | NES=-1.3909                             | NES=-1.3095                                      | NES=-1.6539                                      | 28                     | 18                            | 14                | 9                                                                  | 12                                                                 |
|         | 57     | NES=0.8261                              | NES=-0.8042                                      | NES=0.7859                                       | 31                     | 6                             |                   |                                                                    |                                                                    |
| UCEC    | 97     | NES=-1.9858                             | NES=-1.947                                       | NES=-1.9961                                      | 16                     | 9                             | 8                 | 7                                                                  | 8                                                                  |
| z-score | GPX2   | -0.5892                                 | -0.7039                                          | -0.775                                           |                        |                               |                   |                                                                    |                                                                    |

Experimental validation results on the gene level. Table shows the detailed GSEA enrichment results for the target genes of GPX2 in each of the three perturbation experiments upon GPX2 knockdown in the lung adenocarcinoma A549 cell line derived from LINC (columns: consensus, shRNA1, shRNA2) in each of the 8 modules regulated by GPX2 in the 5 cancer sites (rows: modules organized by the 5 sites in the following order: LUAD, LUSC, BLCA, HNSC, UCEC). For each of the 8 modules in the 5 cancer sites, we enlisted the predicted target genes of modules regulated by GPX2 as an activator of its targets. The z-score for each GPX2 knockdown experiment and each target gene is shown. Target genes repressed and induced by GPX2 knockdown experiments are represented in blue and red, respectively, and those that were identified as 'leading edge' genes driving the GSEA enrichment scores are highlighted in bold. The leading edge columns indicate whether the target gene is part of the leading edge gene set, and a value of NA is shown if the enrichment is not significant (FDR>0.25). Genes are sorted from highest negative z-score to highest positive z-score in the consensus signature. The rightmost column indicates whether genes are part of the LINC landmark or being rowspaces in yellow, and visualized in grey if not a member of these rowspaces.

DETAILED

| Cancer | Module | P-value & FDR consensus (A549/CGS001_A549_96H.GPX2.1) | P-value & FDR shRNA2 (A549/KDC007_A549_96H.TRCN0000046238.666) | P-value & FDR shRNA1 (A549/KDC007_A549_96H.TRCN0000046239.666) | Gene     | z-scores consensus (A549/CGS001_A549_96H.GPX2.1) | z-scores shRNA2 (A549/KDC007_A549_96H.TRCN0000046238.666) | z-scores shRNA1 (A549/KDC007_A549_96H.TRCN0000046239.666) | Leading Edge consensus (A549/CGS001_A549_96H.GPX2.1) | Leading Edge shRNA2 (A549/KDC007_A549_96H.TRCN0000046238.666) | Leading Edge shRNA1 (A549/KDC007_A549_96H.TRCN0000046239.666) | Measured in LINC |
|--------|--------|-------------------------------------------------------|----------------------------------------------------------------|----------------------------------------------------------------|----------|--------------------------------------------------|-----------------------------------------------------------|-----------------------------------------------------------|------------------------------------------------------|---------------------------------------------------------------|---------------------------------------------------------------|------------------|
| LUAD   | 10     | P-value<0.0001 & FDR<0.0001                           | P-value<0.0001 & FDR<0.0001                                    | P-value=0.0039 & FDR=0.0040                                    | NQO1     | -3.9077                                          | -5.05                                                     | -4.1151                                                   | yes                                                  | yes                                                           | yes                                                           | yes              |
|        |        |                                                       |                                                                |                                                                | AKR1C2   | -1.5429                                          | -1.397                                                    | -1.9425                                                   | yes                                                  | yes                                                           | yes                                                           | yes              |
|        |        |                                                       |                                                                |                                                                | AKR1C1   | -1.4129                                          | -1.2672                                                   | -1.7733                                                   | yes                                                  | yes                                                           | yes                                                           | yes              |
|        |        |                                                       |                                                                |                                                                | PIR      | -1.1001                                          | -1.5504                                                   | -1.2525                                                   | yes                                                  | yes                                                           | yes                                                           | yes              |
|        |        |                                                       |                                                                |                                                                | AKR1C3   | -1.0573                                          | -1.5112                                                   | -0.8801                                                   | yes                                                  | yes                                                           | yes                                                           | yes              |
|        |        |                                                       |                                                                |                                                                | ALDH3A1  | -0.8894                                          | -0.6218                                                   | -1.5314                                                   | yes                                                  | yes                                                           | yes                                                           | yes              |
|        |        |                                                       |                                                                |                                                                | SLC7A11  | -0.765                                           | -0.7579                                                   | -0.9556                                                   | yes                                                  | yes                                                           | yes                                                           | yes              |
|        |        |                                                       |                                                                |                                                                | GULP1    | -0.7022                                          | 0.4383                                                    | -1.6805                                                   | yes                                                  | no                                                            | yes                                                           | yes              |
|        |        |                                                       |                                                                |                                                                | TPD52L1  | -0.5999                                          | -0.8206                                                   | -0.288                                                    | yes                                                  | yes                                                           | no                                                            | yes              |
|        |        |                                                       |                                                                |                                                                | AKR1B10  | -0.5828                                          | -1.0199                                                   | -0.5283                                                   | yes                                                  | yes                                                           | no                                                            | yes              |
|        |        |                                                       |                                                                |                                                                | SLC27A2  | -0.5489                                          | -0.6873                                                   | -0.3873                                                   | yes                                                  | yes                                                           | no                                                            | yes              |
|        |        |                                                       |                                                                |                                                                | CES1     | -0.3253                                          | 0.527                                                     | -1.0298                                                   | no                                                   | no                                                            | yes                                                           | yes              |
|        |        |                                                       |                                                                |                                                                | HGD      | -0.1697                                          | -0.9737                                                   | 0.3265                                                    | no                                                   | yes                                                           | no                                                            | yes              |
|        |        |                                                       |                                                                |                                                                | CYP4F3   | -0.1391                                          | 0.5664                                                    | -0.7957                                                   | no                                                   | no                                                            | yes                                                           | yes              |
|        |        |                                                       |                                                                |                                                                | CBR3     | 0.0549                                           | -0.0434                                                   | 0.0346                                                    | no                                                   | no                                                            | no                                                            | yes              |
|        |        |                                                       |                                                                |                                                                | ALOX12P2 | NA                                               | NA                                                        | NA                                                        | NA                                                   | NA                                                            | NA                                                            | no               |
|        |        |                                                       |                                                                |                                                                | ATAT1    | NA                                               | NA                                                        | NA                                                        | NA                                                   | NA                                                            | NA                                                            | no               |
|        |        |                                                       |                                                                |                                                                | BTBD11   | NA                                               | NA                                                        | NA                                                        | NA                                                   | NA                                                            | NA                                                            | no               |

|      |    |                             |                             |                             |            |         |         |         |     |     |     |     |
|------|----|-----------------------------|-----------------------------|-----------------------------|------------|---------|---------|---------|-----|-----|-----|-----|
|      |    |                             |                             |                             | CA8        | NA      | NA      | NA      | NA  | NA  | NA  | no  |
|      |    |                             |                             |                             | CES1P1     | NA      | NA      | NA      | NA  | NA  | NA  | no  |
|      |    |                             |                             |                             | CKMT1A     | NA      | NA      | NA      | NA  | NA  | NA  | no  |
|      |    |                             |                             |                             | CKMT1B     | NA      | NA      | NA      | NA  | NA  | NA  | no  |
|      |    |                             |                             |                             | CYP4F11    | NA      | NA      | NA      | NA  | NA  | NA  | no  |
|      |    |                             |                             |                             | FAM110C    | NA      | NA      | NA      | NA  | NA  | NA  | no  |
|      |    |                             |                             |                             | GNAL       | NA      | NA      | NA      | NA  | NA  | NA  | no  |
|      |    |                             |                             |                             | GRM1       | NA      | NA      | NA      | NA  | NA  | NA  | no  |
|      |    |                             |                             |                             | HOGA1      | NA      | NA      | NA      | NA  | NA  | NA  | no  |
|      |    |                             |                             |                             | JAKMIP3    | NA      | NA      | NA      | NA  | NA  | NA  | no  |
|      |    |                             |                             |                             | LINC01554  | NA      | NA      | NA      | NA  | NA  | NA  | no  |
|      |    |                             |                             |                             | NRG4       | NA      | NA      | NA      | NA  | NA  | NA  | no  |
|      |    |                             |                             |                             | OSGIN1     | NA      | NA      | NA      | NA  | NA  | NA  | no  |
|      |    |                             |                             |                             | PCDHA13    | NA      | NA      | NA      | NA  | NA  | NA  | no  |
|      |    |                             |                             |                             | PPP2R2C    | NA      | NA      | NA      | NA  | NA  | NA  | no  |
|      |    |                             |                             |                             | RASAL1     | NA      | NA      | NA      | NA  | NA  | NA  | no  |
|      |    |                             |                             |                             | SLC44A5    | NA      | NA      | NA      | NA  | NA  | NA  | no  |
|      |    |                             |                             |                             | SLC9A2     | NA      | NA      | NA      | NA  | NA  | NA  | no  |
|      |    |                             |                             |                             | TAT        | NA      | NA      | NA      | NA  | NA  | NA  | no  |
|      |    |                             |                             |                             | UGT1A6     | NA      | NA      | NA      | NA  | NA  | NA  | no  |
|      |    |                             |                             |                             | WIPF3      | NA      | NA      | NA      | NA  | NA  | NA  | no  |
| LUSC | 64 | P-value=0.3194 & FDR=0.3176 | P-value=0.0919 & FDR=0.1311 | P-value=0.3152 & FDR=0.2990 | AKR1C2     | -1.5429 | -1.397  | -1.9425 | NA  | yes | NA  | yes |
|      |    |                             |                             |                             | ALDH3A1    | -0.8894 | -0.6218 | -1.5314 | NA  | yes | NA  | yes |
|      |    |                             |                             |                             | IGFBP3     | -0.7059 | 0.0352  | -1.239  | NA  | no  | NA  | yes |
|      |    |                             |                             |                             | NMB        | -0.7045 | -0.5993 | -0.9201 | NA  | yes | NA  | yes |
|      |    |                             |                             |                             | AKR1B10    | -0.5828 | -1.0199 | -0.5283 | NA  | yes | NA  | yes |
|      |    |                             |                             |                             | GABRE      | -0.3885 | -0.646  | -0.4588 | NA  | yes | NA  | yes |
|      |    |                             |                             |                             | DNASE1L3   | -0.2633 | 0.4008  | -0.7632 | NA  | no  | NA  | yes |
|      |    |                             |                             |                             | CCNA1      | 0.6155  | 0.1569  | 1.1229  | NA  | no  | NA  | yes |
|      |    |                             |                             |                             | FLG        | 0.8481  | 1.0695  | 0.7032  | NA  | no  | NA  | yes |
|      |    |                             |                             |                             | GSTM1      | 0.8944  | 0.8134  | 0.9605  | NA  | no  | NA  | yes |
|      |    |                             |                             |                             | FGFR1      | 1.1187  | -0.8718 | 2.2158  | NA  | yes | NA  | yes |
|      |    |                             |                             |                             | ADH7       | NA      | NA      | NA      | NA  | NA  | NA  | no  |
|      |    |                             |                             |                             | ANKRD2     | NA      | NA      | NA      | NA  | NA  | NA  | no  |
|      |    |                             |                             |                             | AQP10      | NA      | NA      | NA      | NA  | NA  | NA  | no  |
|      |    |                             |                             |                             | ARTN       | NA      | NA      | NA      | NA  | NA  | NA  | no  |
|      |    |                             |                             |                             | BTBD11     | NA      | NA      | NA      | NA  | NA  | NA  | no  |
|      |    |                             |                             |                             | CAGE1      | NA      | NA      | NA      | NA  | NA  | NA  | no  |
|      |    |                             |                             |                             | CHP2       | NA      | NA      | NA      | NA  | NA  | NA  | no  |
|      |    |                             |                             |                             | CLDN8      | NA      | NA      | NA      | NA  | NA  | NA  | no  |
|      |    |                             |                             |                             | CREG2      | NA      | NA      | NA      | NA  | NA  | NA  | no  |
|      |    |                             |                             |                             | FAM110C    | NA      | NA      | NA      | NA  | NA  | NA  | no  |
|      |    |                             |                             |                             | GPNMB      | NA      | NA      | NA      | NA  | NA  | NA  | no  |
|      |    |                             |                             |                             | LEXM       | NA      | NA      | NA      | NA  | NA  | NA  | no  |
|      |    |                             |                             |                             | LOC285629  | NA      | NA      | NA      | NA  | NA  | NA  | no  |
|      |    |                             |                             |                             | NRG4       | NA      | NA      | NA      | NA  | NA  | NA  | no  |
|      |    |                             |                             |                             | PHEX       | NA      | NA      | NA      | NA  | NA  | NA  | no  |
|      |    |                             |                             |                             | RNF217-AS1 | NA      | NA      | NA      | NA  | NA  | NA  | no  |
|      |    |                             |                             |                             | SLC47A2    | NA      | NA      | NA      | NA  | NA  | NA  | no  |
|      |    |                             |                             |                             | UGT1A6     | NA      | NA      | NA      | NA  | NA  | NA  | no  |
|      | 99 | P-value<0.0001 & FDR<0.0001 | P-value<0.0001 & FDR<0.0001 | P-value<0.0001 & FDR<0.0001 | NQO1       | -3.9077 | -5.05   | -4.1151 | yes | yes | yes | yes |
|      |    |                             |                             |                             | TXNRD1     | -3.5245 | -5.0027 | -3.5326 | yes | yes | yes | yes |
|      |    |                             |                             |                             | AKR1C1     | -1.4129 | -1.2672 | -1.7733 | yes | yes | yes | yes |
|      |    |                             |                             |                             | G6PD       | -1.2406 | -1.3019 | -1.7672 | yes | yes | yes | yes |
|      |    |                             |                             |                             | TRIM16     | -1.1942 | -0.8852 | -1.726  | yes | yes | yes | yes |
|      |    |                             |                             |                             | AKR1C3     | -1.0573 | -1.5112 | -0.8801 | yes | yes | yes | yes |
|      |    |                             |                             |                             | GCLM       | -1.0461 | -1.0761 | -1.133  | yes | yes | yes | yes |
|      |    |                             |                             |                             | PHGDH      | -0.9391 | -1.2214 | -1.1398 | yes | yes | yes | yes |
|      |    |                             |                             |                             | UBL4A      | -0.8477 | -1.1137 | -0.894  | yes | yes | yes | yes |
|      |    |                             |                             |                             | PGD        | -0.7854 | -0.5597 | -1.4009 | yes | yes | yes | yes |
|      |    |                             |                             |                             | ME1        | -0.7668 | -1.6032 | -0.7622 | yes | yes | yes | yes |
|      |    |                             |                             |                             | SLC7A11    | -0.765  | -0.7579 | -0.9556 | yes | yes | yes | yes |
|      |    |                             |                             |                             | GSR        | -0.6728 | 0.1165  | -1.0326 | yes | no  | yes | yes |
|      |    |                             |                             |                             | TIMP4      | -0.5654 | -1.2904 | -0.5245 | yes | yes | yes | yes |
|      |    |                             |                             |                             | CBR1       | -0.5507 | -0.3507 | -0.7467 | yes | yes | yes | yes |
|      |    |                             |                             |                             | GCLC       | -0.4777 | -0.3749 | -0.6569 | yes | yes | yes | yes |
|      |    |                             |                             |                             | LPCAT1     | -0.4186 | -0.5052 | -0.7413 | yes | yes | yes | yes |
|      |    |                             |                             |                             | ABCC3      | -0.3173 | -0.7101 | -0.3496 | yes | yes | no  | yes |

|      |    |                             |                             |                             |         |         |         |         |     |     |     |
|------|----|-----------------------------|-----------------------------|-----------------------------|---------|---------|---------|---------|-----|-----|-----|
|      |    |                             |                             | ABCC2                       | -0.3033 | 0.1059  | -0.9073 | yes     | no  | yes | yes |
|      |    |                             |                             | CYP4F3                      | -0.1391 | 0.5664  | -0.7957 | no      | no  | yes | yes |
|      |    |                             |                             | SLC7A5                      | 0       | 0       | 0       | no      | no  | no  | yes |
|      |    |                             |                             | CBR3                        | 0.0549  | -0.0434 | 0.0346  | no      | no  | no  | yes |
|      |    |                             |                             | EGF                         | 0.2223  | 0.592   | 0.0753  | no      | no  | no  | yes |
|      |    |                             |                             | TNFSF9                      | 0.5654  | 2.1874  | -0.4707 | no      | no  | yes | yes |
|      |    |                             |                             | STC2                        | 1.0092  | 1.7661  | 0.6807  | no      | no  | no  | yes |
|      |    |                             |                             | ABCA4                       | NA      | NA      | NA      | NA      | NA  | NA  | no  |
|      |    |                             |                             | CDRT1                       | NA      | NA      | NA      | NA      | NA  | NA  | no  |
|      |    |                             |                             | CYP4F11                     | NA      | NA      | NA      | NA      | NA  | NA  | no  |
|      |    |                             |                             | FBXW10                      | NA      | NA      | NA      | NA      | NA  | NA  | no  |
|      |    |                             |                             | GCSH                        | NA      | NA      | NA      | NA      | NA  | NA  | no  |
|      |    |                             |                             | GPAT3                       | NA      | NA      | NA      | NA      | NA  | NA  | no  |
|      |    |                             |                             | HHIPL2                      | NA      | NA      | NA      | NA      | NA  | NA  | no  |
|      |    |                             |                             | NKX2-8                      | NA      | NA      | NA      | NA      | NA  | NA  | no  |
|      |    |                             |                             | OSGIN1                      | NA      | NA      | NA      | NA      | NA  | NA  | no  |
|      |    |                             |                             | PANX2                       | NA      | NA      | NA      | NA      | NA  | NA  | no  |
|      |    |                             |                             | PCDHB16                     | NA      | NA      | NA      | NA      | NA  | NA  | no  |
|      |    |                             |                             | PPP2R2C                     | NA      | NA      | NA      | NA      | NA  | NA  | no  |
|      |    |                             |                             | PTGR1                       | NA      | NA      | NA      | NA      | NA  | NA  | no  |
|      |    |                             |                             | SRXN1                       | NA      | NA      | NA      | NA      | NA  | NA  | no  |
|      |    |                             |                             | TRIM16L                     | NA      | NA      | NA      | NA      | NA  | NA  | no  |
|      |    |                             |                             | VSIG10L                     | NA      | NA      | NA      | NA      | NA  | NA  | no  |
| BLCA | 11 | P-value<0.0001 & FDR=0.0051 | P-value<0.0001 & FDR=0.0059 | P-value<0.0001 & FDR=0.0010 | NQO1    | -3.9077 | -5.05   | -4.1151 | yes | yes | yes |
|      |    |                             |                             |                             | AKR1C2  | -1.5429 | -1.397  | -1.9425 | yes | yes | yes |
|      |    |                             |                             |                             | AKR1C1  | -1.4129 | -1.2672 | -1.7733 | yes | yes | yes |
|      |    |                             |                             |                             | PIR     | -1.1001 | -1.5504 | -1.2525 | yes | yes | yes |
|      |    |                             |                             |                             | AKR1C3  | -1.0573 | -1.5112 | -0.8801 | yes | yes | yes |
|      |    |                             |                             |                             | ALDH3A1 | -0.8894 | -0.6218 | -1.5314 | yes | yes | yes |
|      |    |                             |                             |                             | SLC7A11 | -0.765  | -0.7579 | -0.9556 | yes | yes | yes |
|      |    |                             |                             |                             | PART1   | -0.6328 | -0.4605 | -0.8708 | yes | yes | yes |
|      |    |                             |                             |                             | AKR1B10 | -0.5828 | -1.0199 | -0.5283 | yes | yes | no  |
|      |    |                             |                             |                             | ABCC2   | -0.3033 | 0.1059  | -0.9073 | no  | no  | yes |
|      |    |                             |                             |                             | GALNT14 | -0.2911 | -1.556  | 0.006   | no  | yes | no  |
|      |    |                             |                             |                             | CYP4F3  | -0.1391 | 0.5664  | -0.7957 | no  | no  | yes |
|      |    |                             |                             |                             | HKDC1   | 0.2159  | 0.3039  | 0.0716  | no  | no  | no  |
|      |    |                             |                             |                             | ACKR3   | 0.7931  | 0.7037  | 1.0838  | no  | no  | yes |
|      |    |                             |                             |                             | ABCA13  | NA      | NA      | NA      | NA  | NA  | no  |
|      |    |                             |                             |                             | ABCA4   | NA      | NA      | NA      | NA  | NA  | no  |
|      |    |                             |                             |                             | ARTN    | NA      | NA      | NA      | NA  | NA  | no  |
|      |    |                             |                             |                             | CYP4F11 | NA      | NA      | NA      | NA  | NA  | no  |
|      |    |                             |                             |                             | FBXW10  | NA      | NA      | NA      | NA  | NA  | no  |
|      |    |                             |                             |                             | PANX2   | NA      | NA      | NA      | NA  | NA  | no  |
|      |    |                             |                             |                             | PTGR1   | NA      | NA      | NA      | NA  | NA  | no  |
|      |    |                             |                             |                             | VSIG10L | NA      | NA      | NA      | NA  | NA  | no  |
|      |    |                             |                             |                             | WNT5A   | NA      | NA      | NA      | NA  | NA  | no  |
|      | 65 | P-value=0.1846 & FDR=0.3592 | P-value=0.2718 & FDR=0.2760 | P-value=0.0809 & FDR=0.1511 | FLRT3   | -0.4733 | -0.0908 | -0.7503 | NA  | NA  | no  |
|      |    |                             |                             |                             | GPRC5C  | 0.0896  | -0.0065 | 0.4883  | NA  | NA  | yes |
|      |    |                             |                             |                             | GSTT1   | 0.1928  | -0.1707 | 0.618   | NA  | NA  | yes |
|      |    |                             |                             |                             | MAOA    | 0.243   | 0.301   | 0.5727  | NA  | NA  | yes |
|      |    |                             |                             |                             | MECOM   | 0.4886  | 0.7462  | 0.2961  | NA  | NA  | yes |
|      |    |                             |                             |                             | GSTM3   | 1.5561  | 1.0332  | 2.554   | NA  | NA  | yes |
|      |    |                             |                             |                             | ABO     | NA      | NA      | NA      | NA  | NA  | no  |
|      |    |                             |                             |                             | ADRB1   | NA      | NA      | NA      | NA  | NA  | no  |
|      |    |                             |                             |                             | BMP7    | NA      | NA      | NA      | NA  | NA  | no  |
|      |    |                             |                             |                             | BTG2    | NA      | NA      | NA      | NA  | NA  | no  |
|      |    |                             |                             |                             | CEL     | NA      | NA      | NA      | NA  | NA  | no  |
|      |    |                             |                             |                             | COLCA1  | NA      | NA      | NA      | NA  | NA  | no  |
|      |    |                             |                             |                             | CYP4X1  | NA      | NA      | NA      | NA  | NA  | no  |
|      |    |                             |                             |                             | FSTL4   | NA      | NA      | NA      | NA  | NA  | no  |
|      |    |                             |                             |                             | GSTM4   | NA      | NA      | NA      | NA  | NA  | no  |
|      |    |                             |                             |                             | HS6ST2  | NA      | NA      | NA      | NA  | NA  | no  |
|      |    |                             |                             |                             | MAPK10  | NA      | NA      | NA      | NA  | NA  | no  |
|      |    |                             |                             |                             | MPPED2  | NA      | NA      | NA      | NA  | NA  | no  |
|      |    |                             |                             |                             | MRAP2   | NA      | NA      | NA      | NA  | NA  | no  |
|      |    |                             |                             |                             | NPAS1   | NA      | NA      | NA      | NA  | NA  | no  |
|      |    |                             |                             |                             | NRG4    | NA      | NA      | NA      | NA  | NA  | no  |
|      |    |                             |                             |                             | PADI3   | NA      | NA      | NA      | NA  | NA  | no  |

|            |        |                             |                             |                             |         |         |                             |                             |                             |       |         |         |         |     |     |     |     |
|------------|--------|-----------------------------|-----------------------------|-----------------------------|---------|---------|-----------------------------|-----------------------------|-----------------------------|-------|---------|---------|---------|-----|-----|-----|-----|
|            |        |                             |                             |                             | PCP4L1  | NA      | NA                          | NA                          | NA                          | NA    | NA      | no      |         |     |     |     |     |
|            |        |                             |                             |                             | RASSF6  | NA      | NA                          | NA                          | NA                          | NA    | NA      | no      |         |     |     |     |     |
|            |        |                             |                             |                             | RGS6    | NA      | NA                          | NA                          | NA                          | NA    | NA      | no      |         |     |     |     |     |
|            |        |                             |                             |                             | SLC52A1 | NA      | NA                          | NA                          | NA                          | NA    | NA      | no      |         |     |     |     |     |
|            |        |                             |                             |                             | UGT1A6  | NA      | NA                          | NA                          | NA                          | NA    | NA      | no      |         |     |     |     |     |
|            |        |                             |                             |                             | UGT1A9  | NA      | NA                          | NA                          | NA                          | NA    | NA      | no      |         |     |     |     |     |
|            |        |                             |                             |                             | WBSCR27 | NA      | NA                          | NA                          | NA                          | NA    | NA      | no      |         |     |     |     |     |
|            |        |                             |                             |                             | ZNF703  | NA      | NA                          | NA                          | NA                          | NA    | NA      | no      |         |     |     |     |     |
| HNSC       | 27     | P-value=0.1176 & FDR=0.1307 | P-value=0.1582 & FDR=0.1784 | P-value=0.0325 & FDR=0.0374 | NQO1    | -3.9077 | -5.05                       | -4.1151                     | yes                         | yes   | yes     | yes     |         |     |     |     |     |
|            |        |                             |                             |                             | AKR1C2  | -1.5429 | -1.397                      | -1.9425                     | yes                         | yes   | yes     | yes     |         |     |     |     |     |
|            |        |                             |                             |                             | AKR1C1  | -1.4129 | -1.2672                     | -1.7733                     | yes                         | yes   | yes     | yes     |         |     |     |     |     |
|            |        |                             |                             |                             | AKR1C3  | -1.0573 | -1.5112                     | -0.8801                     | yes                         | yes   | yes     | yes     |         |     |     |     |     |
|            |        |                             |                             |                             | ME1     | -0.7668 | -1.6032                     | -0.7622                     | yes                         | yes   | yes     | yes     |         |     |     |     |     |
|            |        |                             |                             |                             | SLC7A11 | -0.765  | -0.7579                     | -0.9556                     | yes                         | yes   | yes     | yes     |         |     |     |     |     |
|            |        |                             |                             |                             | AKR1B10 | -0.5828 | -1.0199                     | -0.5283                     | yes                         | yes   | yes     | yes     |         |     |     |     |     |
|            |        |                             |                             |                             | LPCAT1  | -0.4186 | -0.5052                     | -0.7413                     | yes                         | yes   | yes     | yes     |         |     |     |     |     |
|            |        |                             |                             |                             | METAP2  | -0.4097 | 0.1892                      | -0.6109                     | yes                         | no    | yes     | yes     |         |     |     |     |     |
|            |        |                             |                             |                             | CES1    | -0.3253 | 0.527                       | -1.0298                     | yes                         | no    | yes     | yes     |         |     |     |     |     |
|            |        |                             |                             |                             | ABCC2   | -0.3033 | 0.1059                      | -0.9073                     | yes                         | no    | yes     | yes     |         |     |     |     |     |
|            |        |                             |                             |                             | CYP4F3  | -0.1391 | 0.5664                      | -0.7957                     | yes                         | no    | yes     | yes     |         |     |     |     |     |
|            |        |                             |                             |                             | GSTA4   | -0.0927 | -0.5167                     | 0.1488                      | yes                         | yes   | no      | yes     |         |     |     |     |     |
|            |        |                             |                             |                             | TSPAN7  | -0.079  | 0.202                       | -0.3327                     | yes                         | no    | no      | yes     |         |     |     |     |     |
|            |        |                             |                             |                             | RAP1GAP | 0.365   | -0.1657                     | 0.3302                      | no                          | no    | no      | yes     |         |     |     |     |     |
|            |        |                             |                             |                             | GSTM1   | 0.8944  | 0.8134                      | 0.9605                      | no                          | no    | no      | yes     |         |     |     |     |     |
|            |        |                             |                             |                             | GSTM2   | 0.9471  | 0.731                       | 1.0905                      | no                          | no    | no      | yes     |         |     |     |     |     |
|            |        |                             |                             |                             | GSTM3   | 1.5561  | 1.0332                      | 2.554                       | no                          | no    | no      | yes     |         |     |     |     |     |
|            |        |                             |                             |                             | SEPT5   | NA      | NA                          | NA                          | NA                          | NA    | NA      | no      |         |     |     |     |     |
|            |        |                             |                             |                             | CHODL   | NA      | NA                          | NA                          | NA                          | NA    | NA      | no      |         |     |     |     |     |
|            |        |                             |                             |                             | CYP4F11 | NA      | NA                          | NA                          | NA                          | NA    | NA      | no      |         |     |     |     |     |
|            |        |                             |                             |                             | GPAT3   | NA      | NA                          | NA                          | NA                          | NA    | NA      | no      |         |     |     |     |     |
|            |        |                             |                             |                             | GSTM4   | NA      | NA                          | NA                          | NA                          | NA    | NA      | no      |         |     |     |     |     |
|            |        |                             |                             |                             | HHIPL2  | NA      | NA                          | NA                          | NA                          | NA    | NA      | no      |         |     |     |     |     |
|            |        |                             |                             |                             | MAP2    | NA      | NA                          | NA                          | NA                          | NA    | NA      | no      |         |     |     |     |     |
|            |        |                             |                             |                             | OSGIN1  | NA      | NA                          | NA                          | NA                          | NA    | NA      | no      |         |     |     |     |     |
|            |        |                             |                             |                             | PCDHB16 | NA      | NA                          | NA                          | NA                          | NA    | NA      | no      |         |     |     |     |     |
|            |        |                             |                             |                             | SOST    | NA      | NA                          | NA                          | NA                          | NA    | NA      | no      |         |     |     |     |     |
|            |        |                             |                             |                             | UCEC    | 97      | P-value=0.6747 & FDR=0.6836 | P-value=0.7072 & FDR=0.7117 | P-value=0.7390 & FDR=0.7393 | NMB   | -0.7045 | -0.5993 | -0.9201 | NA  | NA  | NA  | yes |
|            |        |                             |                             |                             |         |         |                             |                             |                             | ABCC3 | -0.3173 | -0.7101 | -0.3496 | NA  | NA  | NA  | yes |
|            |        |                             |                             |                             |         |         |                             |                             |                             | MATN2 | -0.1975 | 0.5157  | -0.663  | NA  | NA  | NA  | yes |
|            |        |                             |                             |                             |         |         |                             |                             |                             | PFN2  | 0.3866  | 0.3465  | 0.4914  | NA  | NA  | NA  | yes |
| ACKR3      | 0.7931 | 0.7037                      | 1.0838                      | NA                          |         |         |                             |                             |                             | NA    | NA      | yes     |         |     |     |     |     |
| GLI2       | 0.8461 | -0.4884                     | 1.9946                      | NA                          |         |         |                             |                             |                             | NA    | NA      | yes     |         |     |     |     |     |
| ADSSL1     | NA     | NA                          | NA                          | NA                          |         |         |                             |                             |                             | NA    | NA      | no      |         |     |     |     |     |
| ARTN       | NA     | NA                          | NA                          | NA                          |         |         |                             |                             |                             | NA    | NA      | no      |         |     |     |     |     |
| B4GALNT1   | NA     | NA                          | NA                          | NA                          |         |         |                             |                             |                             | NA    | NA      | no      |         |     |     |     |     |
| CCL26      | NA     | NA                          | NA                          | NA                          |         |         |                             |                             |                             | NA    | NA      | no      |         |     |     |     |     |
| CHP2       | NA     | NA                          | NA                          | NA                          |         |         |                             |                             |                             | NA    | NA      | no      |         |     |     |     |     |
| CREG2      | NA     | NA                          | NA                          | NA                          |         |         |                             |                             |                             | NA    | NA      | no      |         |     |     |     |     |
| DGKG       | NA     | NA                          | NA                          | NA                          |         |         |                             |                             |                             | NA    | NA      | no      |         |     |     |     |     |
| FER1L6     | NA     | NA                          | NA                          | NA                          |         |         |                             |                             |                             | NA    | NA      | no      |         |     |     |     |     |
| GPNMB      | NA     | NA                          | NA                          | NA                          |         |         |                             |                             |                             | NA    | NA      | no      |         |     |     |     |     |
| HOGA1      | NA     | NA                          | NA                          | NA                          |         |         |                             |                             |                             | NA    | NA      | no      |         |     |     |     |     |
| LMO1       | NA     | NA                          | NA                          | NA                          |         |         |                             |                             |                             | NA    | NA      | no      |         |     |     |     |     |
| NANOS1     | NA     | NA                          | NA                          | NA                          |         |         |                             |                             |                             | NA    | NA      | no      |         |     |     |     |     |
| NAP1L2     | NA     | NA                          | NA                          | NA                          |         |         |                             |                             |                             | NA    | NA      | no      |         |     |     |     |     |
| NDRG4      | NA     | NA                          | NA                          | NA                          |         |         |                             |                             |                             | NA    | NA      | no      |         |     |     |     |     |
| NDUFA4L2   | NA     | NA                          | NA                          | NA                          |         |         |                             |                             |                             | NA    | NA      | no      |         |     |     |     |     |
| NGEF       | NA     | NA                          | NA                          | NA                          |         |         |                             |                             |                             | NA    | NA      | no      |         |     |     |     |     |
| NKX2-8     | NA     | NA                          | NA                          | NA                          |         |         |                             |                             |                             | NA    | NA      | no      |         |     |     |     |     |
| NOS1       | NA     | NA                          | NA                          | NA                          |         |         |                             |                             |                             | NA    | NA      | no      |         |     |     |     |     |
| NRG4       | NA     | NA                          | NA                          | NA                          |         |         |                             |                             |                             | NA    | NA      | no      |         |     |     |     |     |
| PANX2      | NA     | NA                          | NA                          | NA                          |         |         |                             |                             |                             | NA    | NA      | no      |         |     |     |     |     |
| PHEX       | NA     | NA                          | NA                          | NA                          |         |         |                             |                             |                             | NA    | NA      | no      |         |     |     |     |     |
| SLC13A5    | NA     | NA                          | NA                          | NA                          |         |         |                             |                             |                             | NA    | NA      | no      |         |     |     |     |     |
| SLC22A18AS | NA     | NA                          | NA                          | NA                          |         |         |                             |                             |                             | NA    | NA      | no      |         |     |     |     |     |
| STK31      | NA     | NA                          | NA                          | NA                          |         |         |                             |                             |                             | NA    | NA      | no      |         |     |     |     |     |
| WNT9A      | NA     | NA                          | NA                          | NA                          |         |         |                             |                             |                             | NA    | NA      | no      |         |     |     |     |     |
|            |        |                             |                             |                             |         |         |                             |                             |                             | NQO1  | -3.9077 | -5.05   | -4.1151 | yes | yes | yes | yes |
